# Supplementary material for: Omics analyses of a somatic Trp53R245W/+ breast cancer model identify cooperating driver events activating PI3K/AKT/mTOR signaling
Source: PubMed Central journal article supplement — Proc Natl Acad Sci U S A. 2022 Nov 2;119(45):e2210618119. doi: 10.1073/pnas.2210618119 (PMC9659373; doi:10.1073/pnas.2210618119), 2022-11-02
Supplement: pnas.2210618119.sapp.pdf [file pnas.2210618119.sapp.pdf]

## Supplementary Information for

Omics analyses of a somatic *Trp53*<sup>R245W/+</sup> breast cancer model identify cooperating driver events activating PI3K/AKT/mTOR signaling

Xiaojie Yu<sup>a</sup>, Yun Zhang<sup>b</sup>, Shunbin Xiong<sup>a</sup>, Joy M. McDaniel<sup>a</sup>, Chang Sun<sup>a,c</sup>, Gilda P. Chau<sup>a</sup>, Jovanka Gencel-Augusto<sup>a,c</sup>, Dhruv Chachad<sup>a,c</sup>, Rhiannon L. Morrissey<sup>a,c</sup>, Xiayu Rao<sup>d</sup>, Jing Wang<sup>d</sup>, Guillermina Lozano<sup>a\*</sup>

Guillermina Lozano  
Email: gglozano@mdanderson.org

### This PDF file includes:

Supplementary Figures 1 to 11  
Supplementary Tables 1 to 4

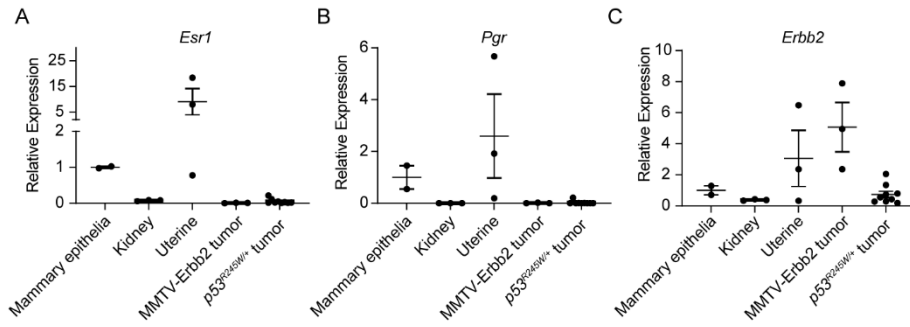

**Supplementary Figure 1. The somatic *p53*<sup>R245W</sup>-driven mouse mammary tumors included in the study are triple negative breast cancer. A-C.** qRT-PCR analysis for *Esr1*, *Pgr* and *ErbB2*. WT mouse mammary epithelia and kidney are used as negative controls, uterine tissues are used as positive controls, mammary MMTV-ErbB2 tumors are used as positive controls for *ErbB2*, and *p53*<sup>R245W/+</sup> tumors are from the nine samples included in this study.

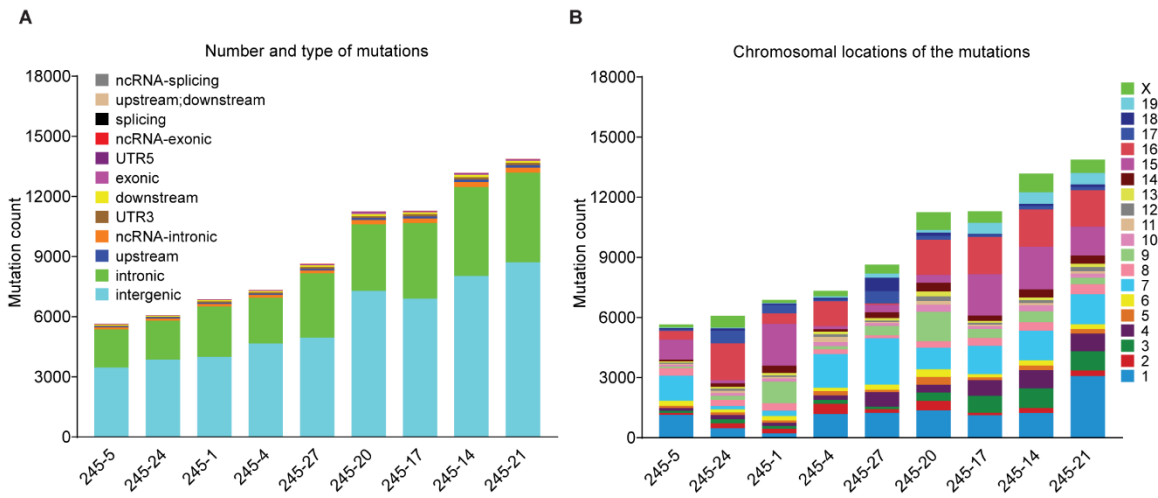

**Supplementary Figure 2. Mutation landscape of somatic *p53<sup>R245W</sup>*-driven mammary tumors. **A.** The graph presenting total mutation count in 9 *Trp53<sup>R245W/+</sup>* breast tumors. The distribution of mutations in different genetic regions was also shown. **B.** The graph depicting distribution of mutations on different chromosomes for each tumor.**

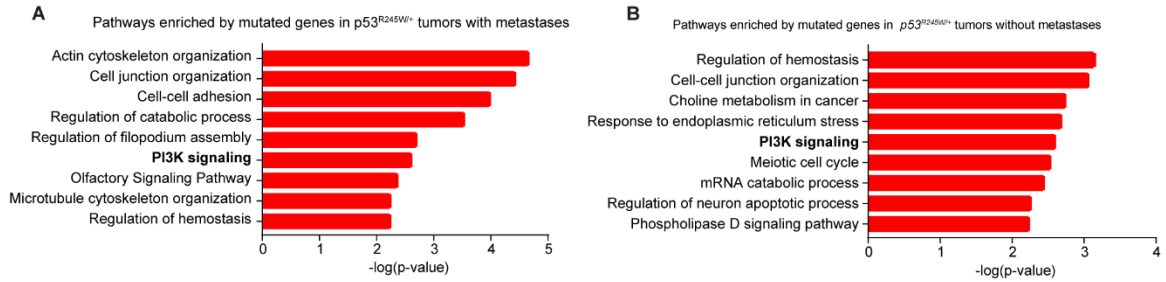

**Supplementary Figure 3. WGS identifies the disruption of Pi3k/Akt/mTOR signaling in  $Trp53^{R245W/+}$  breast tumors. A.** GO enrichment analysis of the mutated genes identified in  $Trp53^{R245W/+}$  tumors with metastasis. **B.** GO enrichment analysis of the mutated genes identified in  $Trp53^{R245W/+}$  tumors without metastasis.

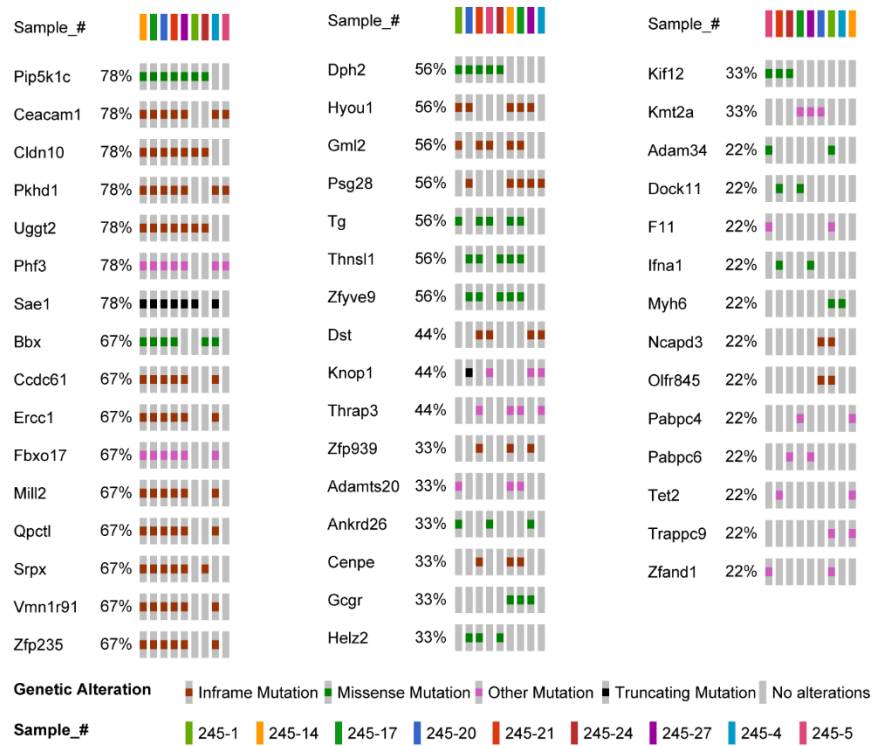

**Supplementary Figure 4. Recurrent mutations identified in mouse breast tumors driven by a somatic *Trp53*<sup>R245W</sup>.** OncoPrint representation of the 46 recurrent mutations identified in *Trp53*<sup>R245W/+</sup> tumors. Samples are arranged in rows with genes labeled along columns.

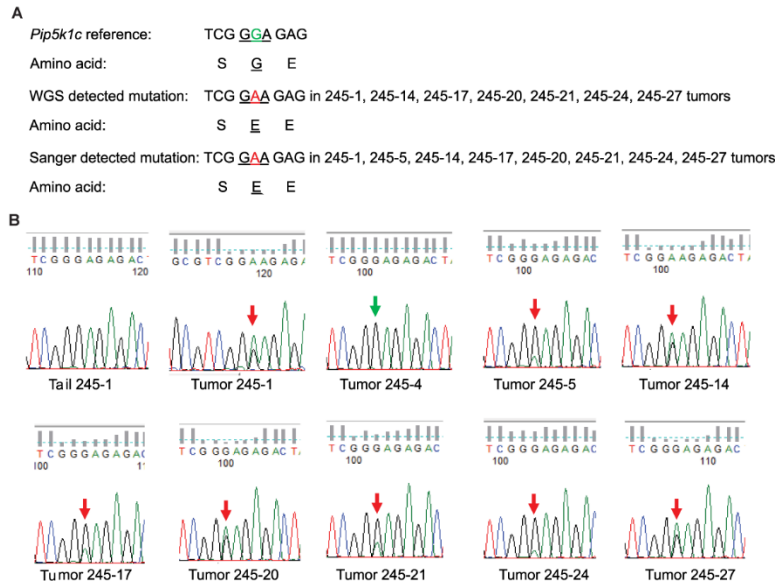

**Supplementary Figure 5. Validation of *Pip5k1c*<sup>G67E</sup> mutation in tumor tissues.**

**A.** Illustration of the identified *Pip5k1c*<sup>G67E</sup> mutation in *Trp53*<sup>R245W/+</sup> tumors. Whole genome sequencing identified the *Pip5k1c*<sup>G67E</sup> mutation in 7 *Trp53*<sup>R245W/+</sup> tumors. Sanger sequencing confirmed the *Pip5k1c*<sup>G67E</sup> mutation in the same 7 *Trp53*<sup>R245W/+</sup> tumors and identified the mutation in an additional tumor sample. Green indicates wildtype; red indicates mutant. **B.** Chromatography illustration of the Sanger sequencing results in 9 *Trp53*<sup>R245W/+</sup> tumors and 1 tail control. Green arrows point to wildtype *Pip5k1c*; red arrows point to *Pip5k1c*<sup>G67E</sup>.

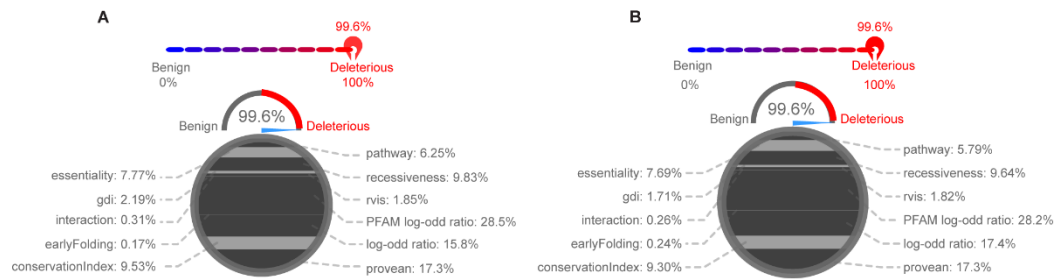

**Supplementary Figure 6. p53R175H and p53R248W are predicted to be deleterious. A.** Human p53R175H is predicted to be deleterious and disease-causing with a score of 0.996 by DEOGEN2. **B.** Human p53R248W is predicted to be deleterious and disease-causing with a score of 0.996 by DEOGEN2.

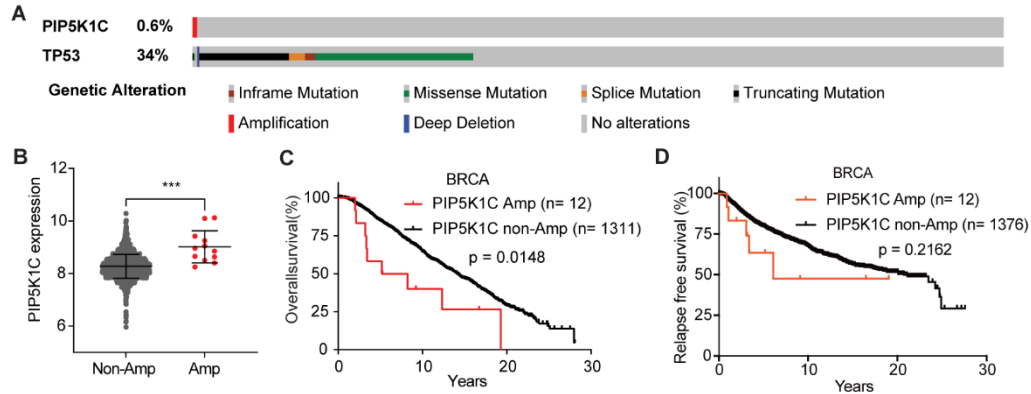

**Supplementary Figure 7. *PIP5K1C* is amplified in human breast cancer and associates with worse survival.** **A.** Oncoprint representation of *PIP5K1C* and *TP53* mutations in human breast tumors (n=2173). **B.** Association of *PIP5K1C* expression with copy numbers in human breast tumors. **C.** Comparison of overall survival in human breast cancer (BRCA) patients with or without *PIP5K1C* amplification. **D.** Comparison of relapse-free survival in BRCA patients with or without *PIP5K1C* amplification. \*\*\*,  $p < 0.001$ .



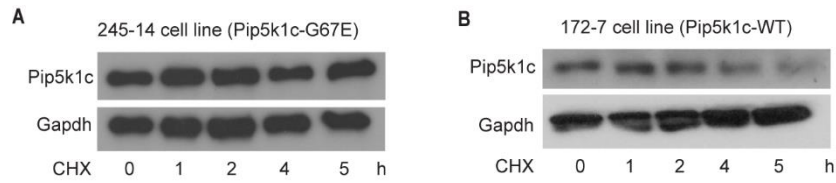

**Supplementary Figure 8. *Pip5k1c*<sup>G67E</sup> mutation stabilizes Pip5k1c protein. A.** Western blot showing the stability of Pip5k1c protein in tumor-derived cell line 245-14 treated with 33 µg/mL cycloheximide (CHX) and harvested at different time points. **B.** Western blot showing the stability of Pip5k1c protein in tumor-derived cell line 172-7 treated with 33 µg/mL cycloheximide (CHX) and harvested at different time points.

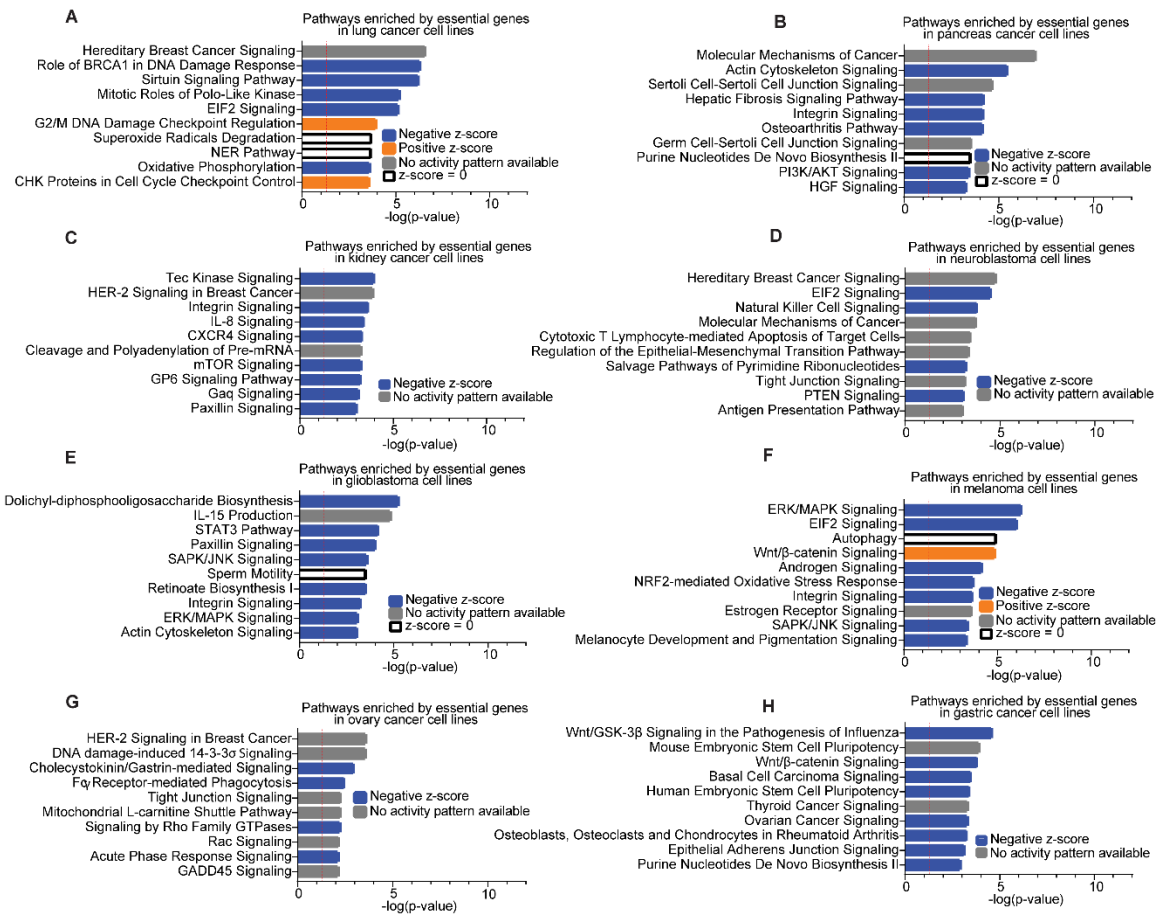

**Supplementary Figure 9. Essential pathways identified by IPA in various types of cancer cell lines.** IPA analysis of the essential genes in various types of cancers generated top 10 essential pathways in each type of cancer.

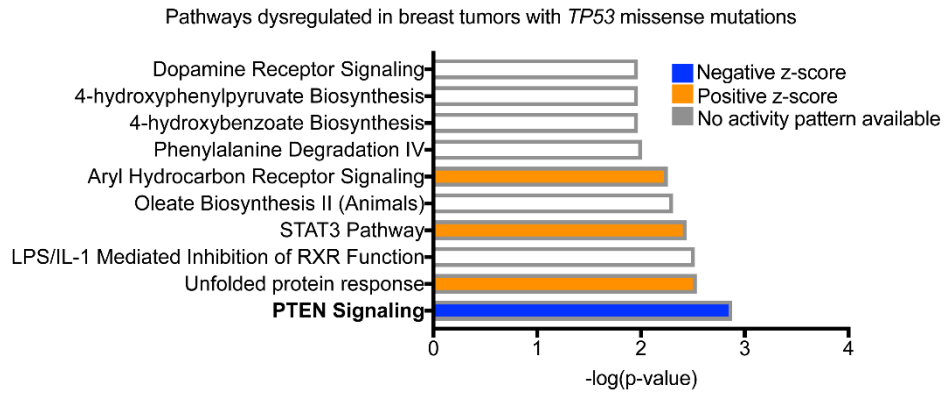

**Supplementary Figure 10. PTEN signaling is downregulated in human breast cancer with *TP53* missense mutations.** IPA analysis of the significantly upregulated genes in *TP53* mutant breast cancer compared to *TP53* wildtype breast cancer.

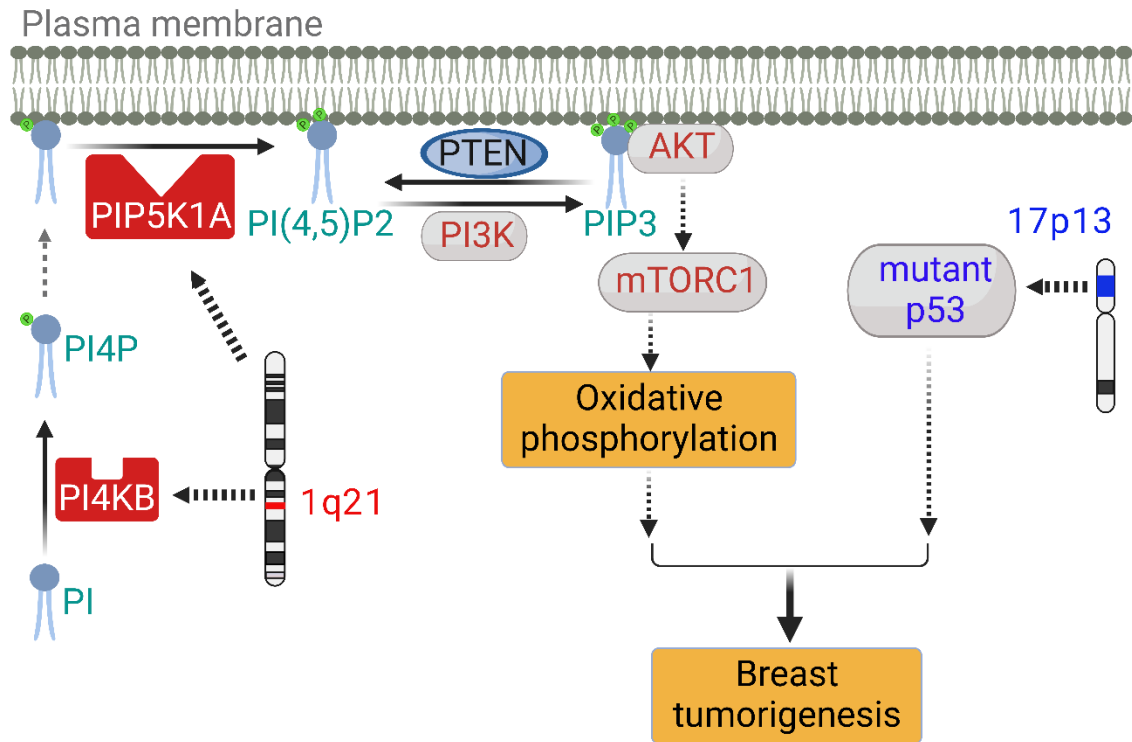

**Supplementary Figure 11. Proposed model.** Figure shows a summary of the role of *PI4KB/PIP5K1A* amplification in activating PI3K signaling to drive breast tumorigenesis. Graph was created with BioRender.com.

**Supplementary Table 1. Putative driver mutations identified by WGS in mouse breast tumors driven by somatic *Trp53*<sup>R245W</sup>**

| <b>Gene</b>   | <b>Amino Acid Change</b> | <b>Samples with mutations</b> | <b>Gene function</b> | <b>Source</b> |
|---------------|--------------------------|-------------------------------|----------------------|---------------|
| <i>Abi1</i>   | p.E250Q                  | 245-20                        | TSG                  | OncoKB        |
| <i>Cenpe</i>  | p.K1176S                 | 245-14, 245-17, 245-21        | Oncogene             | Ref(35, 36)   |
| <i>ErbB2</i>  | p.S1079A                 | 245-20                        | Oncogene             | OncoKB        |
| <i>Grin2a</i> | p.V203M                  | 245-21                        | TSG                  | OncoKB        |
| <i>Kmt2a</i>  | p.G66delinsAG            | 245-17, 245-20, 245-27        | TSG                  | OncoKB        |
| <i>Kras</i>   | p.G12D                   | 245-1                         | Oncogene             | OncoKB        |
| <i>Nf1</i>    | p.R2271X                 | 245-5                         | TSG                  | OncoKB        |
| <i>Pax3</i>   | p.Q407P                  | 245-21                        | Oncogene             | OncoKB        |
| <i>Pten</i>   | p.R233fs                 | 245-27                        | TSG                  | OncoKB        |
| <i>Reln</i>   | p.G182E                  | 245-20                        | TSG                  | OncoKB        |
| <i>Tet2</i>   | p.L700delinsQQL          | 245-14, 245-21                | TSG                  | OncoKB        |
| <i>Tle1</i>   | p.Q735H                  | 245-24                        | Oncogene             | OncoKB        |
| <i>Wdr11</i>  | p.F927V                  | 245-14                        | TSG                  | Ref(40)       |

TSG: tumor suppressor gene

**Supplementary Table 2. Summary of breast cancer cell lines used in genetic screens in DepMap.**

| <b>Cell line</b> | <b>TP53 status</b> | <b>p53 Amino Acid Change</b> | <b>Hormone status</b> |
|------------------|--------------------|------------------------------|-----------------------|
| KPL1             | WT                 |                              | ER+ HER2-             |
| MCF7             | WT                 |                              | ER+ HER2-             |
| ZR751            | WT                 |                              | ER+ HER2-             |
| CAL51            | WT                 |                              | TNBC                  |
| DU4475           | WT                 |                              | TNBC                  |
| SKBR3            | MUT                | p.R175H                      | ER- HER2+             |
| JIMT1            | MUT                | p.R248W                      | ER- HER2+             |
| HCC202           | MUT                | p.T284fs                     | ER- HER2+             |
| HCC1954          | MUT                | p.Y163C                      | ER- HER2+             |
| HCC1428          | MUT                | p.?                          | ER+ HER2-             |
| CAMA1            | MUT                | p.R280T                      | ER+ HER2-             |
| MDAMB415         | MUT                | p.Y236C                      | ER+ HER2-             |
| SUM52PE          | MUT                | p.R213*                      | ER+ HER2+             |
| HCC1419          | MUT                | p.Y220C                      | ER+ HER2+             |
| AU565            | MUT                | p.R175H                      | HER2+                 |
| CAL120           | MUT                | p.?                          | TNBC                  |
| MDAMB157         | MUT                | p.?                          | TNBC                  |
| MDAMB436         | MUT                | p.?                          | TNBC                  |
| MDAMB453         | MUT                | p.?                          | TNBC                  |
| SUM159PT         | MUT                | p.?                          | TNBC                  |
| HCC1187          | MUT                | p.G108del                    | TNBC                  |
| EFM19            | MUT                | p.H193R                      | TNBC                  |
| SUM149PT         | MUT                | p.M237I                      | TNBC                  |
| HMC18            | MUT                | p.P152fs                     | TNBC                  |
| HCC1395          | MUT                | p.R175H                      | TNBC                  |
| HCC1143          | MUT                | p.R248Q                      | TNBC                  |
| BT549            | MUT                | p.R249S                      | TNBC                  |

|          |     |          |      |
|----------|-----|----------|------|
| SUM229PE | MUT | p.R273C  | TNBC |
| MDAMB468 | MUT | p.R273H  | TNBC |
| HCC38    | MUT | p.R273L  | TNBC |
| MDAMB231 | MUT | p.R280K  | TNBC |
| HCC1937  | MUT | p.R306*  | TNBC |
| HCC1806  | MUT | p.T256fs | TNBC |
| HS578T   | MUT | p.V157F  | TNBC |

---

WT, wildtype.  
MUT, mutant.

**Supplementary Table 3. Receptor status of breast cancer patients with co-amplification of *PI4KB* and *PIP5K1A* in METABRIC data.**

| <b>Sample ID</b> | <b>Cancer Type Detailed</b>      | <b>ER status measured by IHC</b> | <b>HER2 Status</b> |
|------------------|----------------------------------|----------------------------------|--------------------|
| MB-0115          | Breast Invasive Ductal Carcinoma | Negative                         | Negative           |
| MB-0206          | Breast Invasive Ductal Carcinoma | Negative                         | Negative           |
| MB-0303          | Breast Invasive Ductal Carcinoma | Negative                         | Negative           |
| MB-0446          | Breast Invasive Ductal Carcinoma | Negative                         | Negative           |
|                  | Breast Invasive Lobular          |                                  |                    |
| MB-0582          | Carcinoma                        | Negative                         | Negative           |
| MB-0658          | Breast Invasive Ductal Carcinoma | Negative                         | Negative           |
| MB-2827          | Breast Invasive Ductal Carcinoma | Negative                         | Negative           |
| MB-3057          | Breast Invasive Ductal Carcinoma | Negative                         | Negative           |
| MB-3058          | Breast Invasive Ductal Carcinoma | Negative                         | Negative           |
| MB-3297          | Breast Invasive Ductal Carcinoma | Negative                         | Negative           |
| MB-3396          | Breast Invasive Ductal Carcinoma | Negative                         | Negative           |
| MB-3476          | Breast Invasive Ductal Carcinoma | Negative                         | Negative           |
| MB-4622          | Breast Invasive Ductal Carcinoma | Negative                         | Negative           |
| MB-4732          | Breast Invasive Ductal Carcinoma | Negative                         | Negative           |
| MB-4769          | Breast Invasive Ductal Carcinoma | Negative                         | Negative           |
| MB-4938          | Breast Invasive Ductal Carcinoma | Negative                         | Negative           |
| MB-5126          | Breast Invasive Ductal Carcinoma | Negative                         | Negative           |
| MB-5173          | Breast Invasive Ductal Carcinoma | Negative                         | Negative           |
| MB-5258          | Breast Invasive Ductal Carcinoma | Negative                         | Negative           |
|                  | Breast Invasive Lobular          |                                  |                    |
| MB-5298          | Carcinoma                        | Negative                         | Negative           |
| MB-5335          | Breast Invasive Ductal Carcinoma | Negative                         | Negative           |
| MB-5442          | Breast Invasive Ductal Carcinoma | Negative                         | Negative           |
| MB-5450          | Breast Invasive Ductal Carcinoma | Negative                         | Negative           |
| MB-5526          | Breast Invasive Ductal Carcinoma | Negative                         | Negative           |



|         |                                  |          |          |
|---------|----------------------------------|----------|----------|
| MB-5551 | Breast Invasive Ductal Carcinoma | Negative | Negative |
| MB-5560 | Breast Invasive Ductal Carcinoma | Negative | Negative |
| MB-5565 | Breast Invasive Ductal Carcinoma | Negative | Negative |
| MB-6143 | Breast Invasive Ductal Carcinoma | Negative | Negative |
| MB-6188 | Breast Invasive Ductal Carcinoma | Negative | Negative |
| MB-6248 | Breast Invasive Ductal Carcinoma | Negative | Negative |
| MB-7007 | Breast Invasive Ductal Carcinoma | Negative | Negative |
| MB-7009 | Breast Invasive Ductal Carcinoma | Negative | Negative |
| MB-7023 | Breast Invasive Ductal Carcinoma | Negative | Negative |
| MB-7036 | Breast Invasive Ductal Carcinoma | Negative | Negative |
| MB-7114 | Breast Invasive Ductal Carcinoma | Negative | Negative |
| MB-7145 | Breast Invasive Ductal Carcinoma | Negative | Negative |
| MB-7155 | Breast Invasive Ductal Carcinoma | Negative | Negative |
| MB-7205 | Breast Invasive Ductal Carcinoma | Negative | Negative |
| MB-7269 | Breast Invasive Ductal Carcinoma | Negative | Negative |
| MB-0375 | Breast Invasive Ductal Carcinoma | Negative | Negative |
| MB-0506 | Breast Invasive Ductal Carcinoma | Negative | Negative |
| MB-4987 | Breast Invasive Ductal Carcinoma | Negative | Negative |
| MB-0062 | Breast Invasive Ductal Carcinoma | Negative | Negative |
| MB-0191 | Breast Invasive Ductal Carcinoma | Negative | Negative |
| MB-0200 | Breast Invasive Ductal Carcinoma | Negative | Negative |
| MB-3001 | Breast Invasive Ductal Carcinoma | Negative | Negative |
| MB-4254 | Breast Invasive Ductal Carcinoma | Negative | Negative |
| MB-4332 | Breast Invasive Ductal Carcinoma | Negative | Negative |
| MB-4407 | Breast Invasive Ductal Carcinoma | Negative | Negative |
| MB-4793 | Breast Invasive Ductal Carcinoma | Negative | Negative |
| MB-5102 | Breast Invasive Ductal Carcinoma | Negative | Negative |
| MB-5135 | Breast Invasive Ductal Carcinoma | Negative | Negative |
| MB-5624 | Breast Invasive Ductal Carcinoma | Negative | Negative |
| MB-6098 | Breast Invasive Ductal Carcinoma | Negative | Negative |
| MB-6280 | Breast Invasive Ductal Carcinoma | Negative | Negative |

|         |                                  |          |          |
|---------|----------------------------------|----------|----------|
| MB-7031 | Breast Invasive Ductal Carcinoma | Negative | Negative |
| MB-7055 | Breast Invasive Ductal Carcinoma | Negative | Negative |
| MB-7159 | Breast Invasive Ductal Carcinoma | Negative | Negative |
| MB-7225 | Breast Invasive Ductal Carcinoma | Negative | Negative |
| MB-7267 | Breast Invasive Ductal Carcinoma | Negative | Negative |
| MB-6273 | Breast Invasive Ductal Carcinoma | Negative | Negative |
| MB-5468 | Breast Invasive Ductal Carcinoma | Negative | Positive |
| MB-6114 | Breast Invasive Ductal Carcinoma | Negative | Positive |
| MB-4012 | Breast Invasive Ductal Carcinoma | Negative | Positive |
| MB-5441 | Breast Invasive Ductal Carcinoma | Negative | Positive |
| MB-0201 | Breast Invasive Ductal Carcinoma | Negative | Positive |
| MB-0314 | Breast Invasive Ductal Carcinoma | Negative | Positive |
| MB-0395 | Breast Invasive Ductal Carcinoma | Negative | Positive |
| MB-3025 | Breast Invasive Ductal Carcinoma | Negative | Positive |
| MB-3329 | Breast Invasive Ductal Carcinoma | Negative | Positive |
|         | Breast Mixed Ductal and Lobular  |          |          |
| MB-3467 | Carcinoma                        | Negative | Positive |
| MB-4663 | Breast Invasive Ductal Carcinoma | Negative | Positive |
| MB-4871 | Breast Invasive Ductal Carcinoma | Negative | Positive |
| MB-5199 | Breast Invasive Ductal Carcinoma | Negative | Positive |
| MB-5229 | Breast Invasive Ductal Carcinoma | Negative | Positive |
| MB-6337 | Breast Invasive Ductal Carcinoma | Negative | Positive |
| MB-7020 | Breast Invasive Ductal Carcinoma | Negative | Positive |
| MB-7135 | Breast Invasive Ductal Carcinoma | Negative | Positive |
| MB-7260 | Breast Invasive Ductal Carcinoma | Negative | Positive |
| MB-0522 | Invasive Breast Carcinoma        | Negative | Positive |
| MB-4350 | Breast Invasive Ductal Carcinoma | Negative | Positive |
| MB-0352 | Breast Invasive Ductal Carcinoma | Positive | Negative |
| MB-0500 | Breast Invasive Ductal Carcinoma | Positive | Negative |
| MB-7151 | Breast Invasive Ductal Carcinoma | Positive | Negative |
| MB-4694 | Breast Invasive Ductal Carcinoma | Positive | Negative |

|         |                                  |          |          |
|---------|----------------------------------|----------|----------|
|         | Breast Invasive Lobular          |          |          |
| MB-0653 | Carcinoma                        | Positive | Negative |
| MB-0114 | Breast Invasive Ductal Carcinoma | Positive | Negative |
| MB-0131 | Breast Invasive Ductal Carcinoma | Positive | Negative |
| MB-0134 | Breast Invasive Ductal Carcinoma | Positive | Negative |
| MB-0146 | Breast Invasive Ductal Carcinoma | Positive | Negative |
| MB-0198 | Breast Invasive Ductal Carcinoma | Positive | Negative |
|         | Breast Mixed Ductal and Lobular  |          |          |
| MB-0234 | Carcinoma                        | Positive | Negative |
| MB-0257 | Breast Invasive Ductal Carcinoma | Positive | Negative |
| MB-0261 | Breast Invasive Ductal Carcinoma | Positive | Negative |
| MB-0341 | Invasive Breast Carcinoma        | Positive | Negative |
| MB-0356 | Breast Invasive Ductal Carcinoma | Positive | Negative |
|         | Breast Mixed Ductal and Lobular  |          |          |
| MB-0366 | Carcinoma                        | Positive | Negative |
| MB-0384 | Breast Invasive Ductal Carcinoma | Positive | Negative |
| MB-0417 | Breast Invasive Ductal Carcinoma | Positive | Negative |
| MB-0428 | Breast Invasive Ductal Carcinoma | Positive | Negative |
| MB-0466 | Breast Invasive Ductal Carcinoma | Positive | Negative |
| MB-0475 | Breast Invasive Ductal Carcinoma | Positive | Negative |
|         | Breast Mixed Ductal and Lobular  |          |          |
| MB-0492 | Carcinoma                        | Positive | Negative |
| MB-0514 | Invasive Breast Carcinoma        | Positive | Negative |
| MB-0550 | Breast Invasive Ductal Carcinoma | Positive | Negative |
| MB-0576 | Breast Invasive Ductal Carcinoma | Positive | Negative |
|         | Breast Mixed Ductal and Lobular  |          |          |
| MB-2745 | Carcinoma                        | Positive | Negative |
| MB-2778 | Breast Invasive Ductal Carcinoma | Positive | Negative |
|         | Breast Mixed Ductal and Lobular  |          |          |
| MB-2790 | Carcinoma                        | Positive | Negative |
| MB-2793 | Breast Invasive Ductal Carcinoma | Positive | Negative |

|         |                                  |          |          |
|---------|----------------------------------|----------|----------|
| MB-2838 | Breast Invasive Ductal Carcinoma | Positive | Negative |
| MB-2954 | Breast Invasive Ductal Carcinoma | Positive | Negative |
| MB-2966 | Breast Invasive Ductal Carcinoma | Positive | Negative |
|         | Breast Invasive Lobular          |          |          |
| MB-3002 | Carcinoma                        | Positive | Negative |
|         | Breast Invasive Lobular          |          |          |
| MB-3021 | Carcinoma                        | Positive | Negative |
|         | Breast Mixed Ductal and Lobular  |          |          |
| MB-3092 | Carcinoma                        | Positive | Negative |
| MB-3167 | Breast Invasive Ductal Carcinoma | Positive | Negative |
| MB-3301 | Breast Invasive Ductal Carcinoma | Positive | Negative |
|         | Breast Mixed Ductal and Lobular  |          |          |
| MB-3357 | Carcinoma                        | Positive | Negative |
| MB-3371 | Breast Invasive Ductal Carcinoma | Positive | Negative |
| MB-3388 | Breast Invasive Ductal Carcinoma | Positive | Negative |
|         | Breast Mixed Ductal and Lobular  |          |          |
| MB-3576 | Carcinoma                        | Positive | Negative |
| MB-4011 | Breast Invasive Ductal Carcinoma | Positive | Negative |
|         | Breast Mixed Ductal and Lobular  |          |          |
| MB-4046 | Carcinoma                        | Positive | Negative |
| MB-4630 | Breast Invasive Ductal Carcinoma | Positive | Negative |
| MB-4648 | Breast Invasive Ductal Carcinoma | Positive | Negative |
|         | Breast Mixed Ductal and Lobular  |          |          |
| MB-4749 | Carcinoma                        | Positive | Negative |
| MB-4750 | Breast Invasive Ductal Carcinoma | Positive | Negative |
| MB-4767 | Breast Invasive Ductal Carcinoma | Positive | Negative |
| MB-4800 | Breast Invasive Ductal Carcinoma | Positive | Negative |
| MB-4801 | Breast Invasive Ductal Carcinoma | Positive | Negative |
| MB-4849 | Breast Invasive Ductal Carcinoma | Positive | Negative |
| MB-4912 | Breast Invasive Ductal Carcinoma | Positive | Negative |
| MB-4944 | Breast Invasive Ductal Carcinoma | Positive | Negative |

|         |                                                                     |          |          |
|---------|---------------------------------------------------------------------|----------|----------|
| MB-4994 | Breast Invasive Ductal Carcinoma<br>Breast Invasive Lobular         | Positive | Negative |
| MB-4998 | Carcinoma                                                           | Positive | Negative |
| MB-5018 | Breast Invasive Ductal Carcinoma                                    | Positive | Negative |
| MB-5060 | Breast Invasive Ductal Carcinoma                                    | Positive | Negative |
| MB-5117 | Breast Invasive Ductal Carcinoma<br>Breast Invasive Lobular         | Positive | Negative |
| MB-5121 | Carcinoma                                                           | Positive | Negative |
| MB-5139 | Breast Invasive Ductal Carcinoma                                    | Positive | Negative |
| MB-5144 | Breast Invasive Ductal Carcinoma                                    | Positive | Negative |
| MB-5160 | Breast Invasive Ductal Carcinoma                                    | Positive | Negative |
| MB-5167 | Breast Invasive Ductal Carcinoma                                    | Positive | Negative |
| MB-5169 | Breast Invasive Ductal Carcinoma                                    | Positive | Negative |
| MB-5256 | Breast Invasive Ductal Carcinoma<br>Breast Mixed Ductal and Lobular | Positive | Negative |
| MB-5270 | Carcinoma                                                           | Positive | Negative |
| MB-5273 | Breast Invasive Ductal Carcinoma<br>Breast Mixed Ductal and Lobular | Positive | Negative |
| MB-5305 | Carcinoma                                                           | Positive | Negative |
| MB-5361 | Breast Invasive Ductal Carcinoma                                    | Positive | Negative |
| MB-5404 | Breast Invasive Ductal Carcinoma                                    | Positive | Negative |
| MB-5471 | Breast Invasive Ductal Carcinoma                                    | Positive | Negative |
| MB-5491 | Breast Invasive Ductal Carcinoma                                    | Positive | Negative |
| MB-5513 | Breast Invasive Ductal Carcinoma<br>Breast Invasive Lobular         | Positive | Negative |
| MB-5592 | Carcinoma                                                           | Positive | Negative |
| MB-5636 | Breast Invasive Ductal Carcinoma                                    | Positive | Negative |
| MB-5654 | Breast Invasive Ductal Carcinoma                                    | Positive | Negative |
| MB-6097 | Breast Invasive Ductal Carcinoma<br>Breast Invasive Lobular         | Positive | Negative |
| MB-6141 | Carcinoma                                                           | Positive | Negative |

|         |                                  |          |          |
|---------|----------------------------------|----------|----------|
|         | Breast Mixed Ductal and Lobular  |          |          |
| MB-6163 | Carcinoma                        | Positive | Negative |
|         | Breast Mixed Ductal and Lobular  |          |          |
| MB-6179 | Carcinoma                        | Positive | Negative |
| MB-6181 | Breast Invasive Ductal Carcinoma | Positive | Negative |
| MB-6200 | Breast Invasive Ductal Carcinoma | Positive | Negative |
|         | Breast Mixed Ductal and Lobular  |          |          |
| MB-6226 | Carcinoma                        | Positive | Negative |
| MB-6257 | Breast Invasive Ductal Carcinoma | Positive | Negative |
|         | Breast Invasive Mixed Mucinous   |          |          |
| MB-6346 | Carcinoma                        | Positive | Negative |
| MB-7022 | Breast Invasive Ductal Carcinoma | Positive | Negative |
| MB-7097 | Breast Invasive Ductal Carcinoma | Positive | Negative |
| MB-7107 | Breast Invasive Ductal Carcinoma | Positive | Negative |
| MB-7116 | Breast Invasive Ductal Carcinoma | Positive | Negative |
| MB-7131 | Breast Invasive Ductal Carcinoma | Positive | Negative |
| MB-7138 | Breast Invasive Ductal Carcinoma | Positive | Negative |
| MB-7149 | Breast Invasive Ductal Carcinoma | Positive | Negative |
| MB-7157 | Breast Invasive Ductal Carcinoma | Positive | Negative |
| MB-7171 | Breast Invasive Ductal Carcinoma | Positive | Negative |
| MB-7172 | Breast Invasive Ductal Carcinoma | Positive | Negative |
| MB-7176 | Breast Invasive Ductal Carcinoma | Positive | Negative |
| MB-7200 | Breast Invasive Ductal Carcinoma | Positive | Negative |
| MB-7238 | Breast Invasive Ductal Carcinoma | Positive | Negative |
| MB-7254 | Breast Invasive Ductal Carcinoma | Positive | Negative |
| MB-7286 | Breast Invasive Ductal Carcinoma | Positive | Negative |
| MB-7288 | Breast Invasive Ductal Carcinoma | Positive | Negative |
|         | Breast Mixed Ductal and Lobular  |          |          |
| MB-0050 | Carcinoma                        | Positive | Negative |
|         | Breast Invasive Lobular          |          |          |
| MB-0101 | Carcinoma                        | Positive | Negative |

|         |                                  |          |          |
|---------|----------------------------------|----------|----------|
| MB-0122 | Breast Invasive Ductal Carcinoma | Positive | Negative |
|         | Breast Mixed Ductal and Lobular  |          |          |
| MB-0124 | Carcinoma                        | Positive | Negative |
|         | Breast Mixed Ductal and Lobular  |          |          |
| MB-0125 | Carcinoma                        | Positive | Negative |
| MB-0126 | Breast Invasive Ductal Carcinoma | Positive | Negative |
|         | Breast Mixed Ductal and Lobular  |          |          |
| MB-0133 | Carcinoma                        | Positive | Negative |
| MB-0194 | Breast Invasive Ductal Carcinoma | Positive | Negative |
| MB-0232 | Breast Invasive Ductal Carcinoma | Positive | Negative |
| MB-0243 | Breast Invasive Ductal Carcinoma | Positive | Negative |
| MB-0248 | Breast Invasive Ductal Carcinoma | Positive | Negative |
| MB-0273 | Breast Invasive Ductal Carcinoma | Positive | Negative |
| MB-0290 | Breast Invasive Ductal Carcinoma | Positive | Negative |
| MB-0305 | Breast Invasive Ductal Carcinoma | Positive | Negative |
| MB-0309 | Breast Invasive Ductal Carcinoma | Positive | Negative |
| MB-0310 | Breast Invasive Ductal Carcinoma | Positive | Negative |
| MB-0348 | Breast Invasive Ductal Carcinoma | Positive | Negative |
| MB-0386 | Breast Invasive Ductal Carcinoma | Positive | Negative |
| MB-0425 | Breast Invasive Ductal Carcinoma | Positive | Negative |
|         | Breast Invasive Lobular          |          |          |
| MB-0444 | Carcinoma                        | Positive | Negative |
|         | Breast Invasive Mixed Mucinous   |          |          |
| MB-0454 | Carcinoma                        | Positive | Negative |
| MB-0507 | Breast Invasive Ductal Carcinoma | Positive | Negative |
| MB-0511 | Breast Invasive Ductal Carcinoma | Positive | Negative |
| MB-0544 | Breast Invasive Ductal Carcinoma | Positive | Negative |
| MB-0554 | Breast Invasive Ductal Carcinoma | Positive | Negative |
|         | Breast Invasive Lobular          |          |          |
| MB-0605 | Carcinoma                        | Positive | Negative |
| MB-0631 | Breast Invasive Ductal Carcinoma | Positive | Negative |

|         |                                  |          |          |
|---------|----------------------------------|----------|----------|
| MB-0642 | Breast Invasive Ductal Carcinoma | Positive | Negative |
| MB-0891 | Breast Invasive Ductal Carcinoma | Positive | Negative |
| MB-2564 | Breast Invasive Ductal Carcinoma | Positive | Negative |
|         | Breast Mixed Ductal and Lobular  |          |          |
| MB-2610 | Carcinoma                        | Positive | Negative |
| MB-2747 | Breast Invasive Ductal Carcinoma | Positive | Negative |
|         | Breast Mixed Ductal and Lobular  |          |          |
| MB-2750 | Carcinoma                        | Positive | Negative |
|         | Breast Invasive Mixed Mucinous   |          |          |
| MB-2919 | Carcinoma                        | Positive | Negative |
| MB-2931 | Breast Invasive Ductal Carcinoma | Positive | Negative |
|         | Breast Mixed Ductal and Lobular  |          |          |
| MB-2990 | Carcinoma                        | Positive | Negative |
| MB-3032 | Breast Invasive Ductal Carcinoma | Positive | Negative |
| MB-3033 | Breast Invasive Ductal Carcinoma | Positive | Negative |
|         | Breast Mixed Ductal and Lobular  |          |          |
| MB-3037 | Carcinoma                        | Positive | Negative |
|         | Breast Mixed Ductal and Lobular  |          |          |
| MB-3079 | Carcinoma                        | Positive | Negative |
| MB-3298 | Breast Invasive Ductal Carcinoma | Positive | Negative |
| MB-3412 | Breast Invasive Ductal Carcinoma | Positive | Negative |
|         | Breast Mixed Ductal and Lobular  |          |          |
| MB-3439 | Carcinoma                        | Positive | Negative |
| MB-3450 | Breast Invasive Ductal Carcinoma | Positive | Negative |
|         | Breast Mixed Ductal and Lobular  |          |          |
| MB-3781 | Carcinoma                        | Positive | Negative |
| MB-3871 | Breast Invasive Ductal Carcinoma | Positive | Negative |
| MB-4120 | Breast Invasive Ductal Carcinoma | Positive | Negative |
| MB-4140 | Breast Invasive Ductal Carcinoma | Positive | Negative |
| MB-4141 | Breast Invasive Ductal Carcinoma | Positive | Negative |



|         |                                  |          |          |
|---------|----------------------------------|----------|----------|
|         | Breast Mixed Ductal and Lobular  |          |          |
| MB-4293 | Carcinoma                        | Positive | Negative |
| MB-4599 | Breast Invasive Ductal Carcinoma | Positive | Negative |
| MB-4701 | Breast Invasive Ductal Carcinoma | Positive | Negative |
| MB-4709 | Breast Invasive Ductal Carcinoma | Positive | Negative |
| MB-4719 | Breast Invasive Ductal Carcinoma | Positive | Negative |
|         | Breast Invasive Lobular          |          |          |
| MB-4721 | Carcinoma                        | Positive | Negative |
| MB-4735 | Breast Invasive Ductal Carcinoma | Positive | Negative |
|         | Breast Invasive Lobular          |          |          |
| MB-4741 | Carcinoma                        | Positive | Negative |
|         | Breast Mixed Ductal and Lobular  |          |          |
| MB-4742 | Carcinoma                        | Positive | Negative |
|         | Breast Invasive Lobular          |          |          |
| MB-4764 | Carcinoma                        | Positive | Negative |
| MB-4785 | Breast Invasive Ductal Carcinoma | Positive | Negative |
| MB-4825 | Breast Invasive Ductal Carcinoma | Positive | Negative |
| MB-4827 | Breast Invasive Ductal Carcinoma | Positive | Negative |
| MB-4843 | Breast Invasive Ductal Carcinoma | Positive | Negative |
|         | Breast Invasive Lobular          |          |          |
| MB-4853 | Carcinoma                        | Positive | Negative |
| MB-4869 | Breast Invasive Ductal Carcinoma | Positive | Negative |
|         | Breast Invasive Lobular          |          |          |
| MB-4872 | Carcinoma                        | Positive | Negative |
| MB-4899 | Breast Invasive Ductal Carcinoma | Positive | Negative |
| MB-4961 | Breast Invasive Ductal Carcinoma | Positive | Negative |
| MB-4967 | Breast Invasive Ductal Carcinoma | Positive | Negative |
| MB-4977 | Breast Invasive Ductal Carcinoma | Positive | Negative |
|         | Breast Mixed Ductal and Lobular  |          |          |
| MB-4981 | Carcinoma                        | Positive | Negative |
| MB-5015 | Breast Invasive Ductal Carcinoma | Positive | Negative |

|         |                                  |          |          |
|---------|----------------------------------|----------|----------|
|         | Breast Mixed Ductal and Lobular  |          |          |
| MB-5020 | Carcinoma                        | Positive | Negative |
|         | Breast Mixed Ductal and Lobular  |          |          |
| MB-5027 | Carcinoma                        | Positive | Negative |
| MB-5084 | Breast Invasive Ductal Carcinoma | Positive | Negative |
| MB-5088 | Breast Invasive Ductal Carcinoma | Positive | Negative |
| MB-5092 | Breast Invasive Ductal Carcinoma | Positive | Negative |
| MB-5183 | Breast Invasive Ductal Carcinoma | Positive | Negative |
| MB-5221 | Breast Invasive Ductal Carcinoma | Positive | Negative |
|         | Breast Mixed Ductal and Lobular  |          |          |
| MB-5253 | Carcinoma                        | Positive | Negative |
| MB-5264 | Breast Invasive Ductal Carcinoma | Positive | Negative |
| MB-5290 | Breast Invasive Ductal Carcinoma | Positive | Negative |
| MB-5300 | Breast Invasive Ductal Carcinoma | Positive | Negative |
|         | Breast Invasive Lobular          |          |          |
| MB-5330 | Carcinoma                        | Positive | Negative |
|         | Breast Mixed Ductal and Lobular  |          |          |
| MB-5358 | Carcinoma                        | Positive | Negative |
|         | Breast Mixed Ductal and Lobular  |          |          |
| MB-5360 | Carcinoma                        | Positive | Negative |
| MB-5364 | Breast Invasive Ductal Carcinoma | Positive | Negative |
|         | Breast Mixed Ductal and Lobular  |          |          |
| MB-5369 | Carcinoma                        | Positive | Negative |
| MB-5383 | Breast Invasive Ductal Carcinoma | Positive | Negative |
| MB-5395 | Breast Invasive Ductal Carcinoma | Positive | Negative |
| MB-5403 | Breast Invasive Ductal Carcinoma | Positive | Negative |
| MB-5407 | Breast Invasive Ductal Carcinoma | Positive | Negative |
| MB-5412 | Breast Invasive Ductal Carcinoma | Positive | Negative |
|         | Breast Mixed Ductal and Lobular  |          |          |
| MB-5424 | Carcinoma                        | Positive | Negative |

|         |                                  |          |          |
|---------|----------------------------------|----------|----------|
|         | Breast Mixed Ductal and Lobular  |          |          |
| MB-5451 | Carcinoma                        | Positive | Negative |
| MB-5457 | Breast Invasive Ductal Carcinoma | Positive | Negative |
| MB-5473 | Breast Invasive Ductal Carcinoma | Positive | Negative |
|         | Breast Mixed Ductal and Lobular  |          |          |
| MB-5478 | Carcinoma                        | Positive | Negative |
| MB-5490 | Breast Invasive Ductal Carcinoma | Positive | Negative |
|         | Breast Invasive Lobular          |          |          |
| MB-5492 | Carcinoma                        | Positive | Negative |
| MB-5589 | Breast Invasive Ductal Carcinoma | Positive | Negative |
| MB-5626 | Breast Invasive Ductal Carcinoma | Positive | Negative |
|         | Breast Invasive Lobular          |          |          |
| MB-6006 | Carcinoma                        | Positive | Negative |
| MB-6018 | Breast Invasive Ductal Carcinoma | Positive | Negative |
| MB-6024 | Breast Invasive Ductal Carcinoma | Positive | Negative |
| MB-6050 | Breast Invasive Ductal Carcinoma | Positive | Negative |
| MB-6083 | Breast Invasive Ductal Carcinoma | Positive | Negative |
| MB-6118 | Breast Invasive Ductal Carcinoma | Positive | Negative |
|         | Breast Mixed Ductal and Lobular  |          |          |
| MB-6138 | Carcinoma                        | Positive | Negative |
|         | Breast Invasive Lobular          |          |          |
| MB-6167 | Carcinoma                        | Positive | Negative |
|         | Breast Invasive Lobular          |          |          |
| MB-6195 | Carcinoma                        | Positive | Negative |
| MB-6207 | Breast Invasive Ductal Carcinoma | Positive | Negative |
| MB-6211 | Breast Invasive Ductal Carcinoma | Positive | Negative |
| MB-6229 | Breast Invasive Ductal Carcinoma | Positive | Negative |
|         | Breast Mixed Ductal and Lobular  |          |          |
| MB-6233 | Carcinoma                        | Positive | Negative |
|         | Breast Invasive Lobular          |          |          |
| MB-6253 | Carcinoma                        | Positive | Negative |

|         |                                                                     |          |          |
|---------|---------------------------------------------------------------------|----------|----------|
| MB-6256 | Breast Invasive Ductal Carcinoma<br>Breast Invasive Lobular         | Positive | Negative |
| MB-7004 | Carcinoma                                                           | Positive | Negative |
| MB-7005 | Breast Invasive Ductal Carcinoma                                    | Positive | Negative |
| MB-7006 | Breast Invasive Ductal Carcinoma                                    | Positive | Negative |
| MB-7013 | Breast Invasive Ductal Carcinoma                                    | Positive | Negative |
| MB-7026 | Breast Invasive Ductal Carcinoma                                    | Positive | Negative |
| MB-7037 | Breast Invasive Ductal Carcinoma                                    | Positive | Negative |
| MB-7106 | Breast Invasive Ductal Carcinoma                                    | Positive | Negative |
| MB-7167 | Breast Invasive Ductal Carcinoma                                    | Positive | Negative |
| MB-7185 | Breast Invasive Ductal Carcinoma                                    | Positive | Negative |
| MB-7220 | Breast Invasive Ductal Carcinoma                                    | Positive | Negative |
| MB-7228 | Breast Invasive Ductal Carcinoma                                    | Positive | Negative |
| MB-7277 | Breast Invasive Ductal Carcinoma                                    | Positive | Negative |
| MB-7279 | Breast Invasive Ductal Carcinoma                                    | Positive | Negative |
| MB-2771 | Breast Invasive Ductal Carcinoma                                    | Positive | Negative |
| MB-4354 | Breast Invasive Ductal Carcinoma<br>Breast Mixed Ductal and Lobular | Positive | Negative |
| MB-0093 | Carcinoma                                                           | Positive | Negative |
| MB-0097 | Breast Invasive Ductal Carcinoma                                    | Positive | Negative |
| MB-0256 | Breast Invasive Ductal Carcinoma                                    | Positive | Negative |
| MB-0268 | Breast Invasive Ductal Carcinoma<br>Breast Mixed Ductal and Lobular | Positive | Negative |
| MB-0367 | Carcinoma                                                           | Positive | Negative |
| MB-0512 | Breast Invasive Ductal Carcinoma<br>Breast Mixed Ductal and Lobular | Positive | Negative |
| MB-0646 | Carcinoma                                                           | Positive | Negative |
| MB-2952 | Breast Invasive Ductal Carcinoma<br>Breast Invasive Lobular         | Positive | Negative |
| MB-4005 | Carcinoma                                                           | Positive | Negative |
| MB-4222 | Breast Invasive Ductal Carcinoma                                    | Positive | Negative |

|         |                                  |          |          |
|---------|----------------------------------|----------|----------|
| MB-4339 | Breast Invasive Ductal Carcinoma | Positive | Negative |
| MB-4353 | Breast Invasive Ductal Carcinoma | Positive | Negative |
| MB-4368 | Breast Invasive Ductal Carcinoma | Positive | Negative |
| MB-4390 | Breast Invasive Ductal Carcinoma | Positive | Negative |
| MB-4442 | Breast Invasive Ductal Carcinoma | Positive | Negative |
|         | Breast Mixed Ductal and Lobular  |          |          |
| MB-4557 | Carcinoma                        | Positive | Negative |
| MB-4593 | Breast Invasive Ductal Carcinoma | Positive | Negative |
| MB-4598 | Breast Invasive Ductal Carcinoma | Positive | Negative |
| MB-4603 | Breast Invasive Ductal Carcinoma | Positive | Negative |
| MB-4607 | Breast Invasive Ductal Carcinoma | Positive | Negative |
| MB-4744 | Breast Invasive Ductal Carcinoma | Positive | Negative |
|         | Breast Invasive Lobular          |          |          |
| MB-4798 | Carcinoma                        | Positive | Negative |
| MB-4838 | Breast Invasive Ductal Carcinoma | Positive | Negative |
| MB-4976 | Breast Invasive Ductal Carcinoma | Positive | Negative |
|         | Breast Invasive Lobular          |          |          |
| MB-6012 | Carcinoma                        | Positive | Negative |
|         | Breast Mixed Ductal and Lobular  |          |          |
| MB-0589 | Carcinoma                        | Positive | Positive |
| MB-3028 | Breast Invasive Ductal Carcinoma | Positive | Positive |
|         | Breast Invasive Lobular          |          |          |
| MB-4289 | Carcinoma                        | Positive | Positive |
| MB-2847 | Breast Invasive Ductal Carcinoma | Positive | Positive |
| MB-0389 | Breast Invasive Ductal Carcinoma | Positive | Positive |
| MB-0421 | Breast Invasive Ductal Carcinoma | Positive | Positive |
| MB-0465 | Breast Invasive Ductal Carcinoma | Positive | Positive |
| MB-0662 | Breast Invasive Ductal Carcinoma | Positive | Positive |
| MB-2626 | Breast Invasive Ductal Carcinoma | Positive | Positive |
| MB-2786 | Breast Invasive Ductal Carcinoma | Positive | Positive |

|           |                                  |          |          |
|-----------|----------------------------------|----------|----------|
|           | Breast Invasive Lobular          |          |          |
| MB-3379   | Carcinoma                        | Positive | Positive |
| MB-4276   | Breast Invasive Ductal Carcinoma | Positive | Positive |
| MB-4688   | Breast Invasive Ductal Carcinoma | Positive | Positive |
| MB-4796   | Breast Invasive Ductal Carcinoma | Positive | Positive |
| MB-5078   | Breast Invasive Ductal Carcinoma | Positive | Positive |
| MB-5418   | Breast Invasive Ductal Carcinoma | Positive | Positive |
| MB-0046   | Breast Invasive Ductal Carcinoma | Positive | Positive |
| MTS-T0139 | Breast Invasive Ductal Carcinoma | Negative |          |
| MTS-T0160 | Invasive Breast Carcinoma        | Negative |          |
| MTS-T0275 | Breast Invasive Ductal Carcinoma | Negative |          |
| MTS-T0689 | Breast Invasive Ductal Carcinoma | Negative |          |
| MTS-T0694 | Breast Invasive Ductal Carcinoma | Negative |          |
| MTS-T0714 | Breast Invasive Ductal Carcinoma | Negative |          |
| MTS-T1291 | Breast Invasive Ductal Carcinoma | Negative |          |
| MTS-T2407 | Breast Invasive Ductal Carcinoma | Negative |          |
| MB-0025   | Breast Invasive Ductal Carcinoma | Positive |          |
| MTS-T0090 | Breast Invasive Ductal Carcinoma | Positive |          |
| MTS-T0092 | Breast Invasive Ductal Carcinoma | Positive |          |
| MTS-T0134 | Breast Invasive Ductal Carcinoma | Positive |          |
| MTS-T0142 | Breast Invasive Ductal Carcinoma | Positive |          |
|           | Breast Mixed Ductal and Lobular  |          |          |
| MTS-T0153 | Carcinoma                        | Positive |          |
| MTS-T0154 | Breast Invasive Ductal Carcinoma | Positive |          |
| MTS-T0602 | Breast Invasive Ductal Carcinoma | Positive |          |
| MTS-T0711 | Invasive Breast Carcinoma        | Positive |          |
| MTS-T0715 | Breast Invasive Ductal Carcinoma | Positive |          |
| MTS-T1279 | Invasive Breast Carcinoma        | Positive |          |
| MTS-T1283 | Breast Invasive Ductal Carcinoma | Positive |          |
| MTS-T1306 | Breast Invasive Ductal Carcinoma | Positive |          |
| MTS-T1309 | Invasive Breast Carcinoma        | Positive |          |

|           |                                                                     |          |          |
|-----------|---------------------------------------------------------------------|----------|----------|
| MTS-T1311 | Breast Invasive Ductal Carcinoma<br>Breast Mixed Ductal and Lobular | Positive |          |
| MTS-T1991 | Carcinoma                                                           | Positive |          |
| MTS-T2190 | Invasive Breast Carcinoma                                           | Positive |          |
| MTS-T2206 | Invasive Breast Carcinoma                                           | Positive |          |
| MTS-T2409 | Breast Invasive Ductal Carcinoma                                    | Positive |          |
| MTS-T2412 | Breast Invasive Ductal Carcinoma                                    | Positive |          |
| MB-4880   | Breast Invasive Ductal Carcinoma                                    |          | Negative |
| MB-0242   | Breast Invasive Ductal Carcinoma                                    |          | Negative |
| MB-4722   | Breast Invasive Ductal Carcinoma                                    |          | Negative |
| MB-7118   | Breast Invasive Ductal Carcinoma                                    |          | Negative |
| MB-0110   | Invasive Breast Carcinoma                                           |          | Negative |
| MB-7115   | Breast Invasive Ductal Carcinoma<br>Breast Invasive Lobular         |          | Positive |
| MTS-T0066 | Carcinoma                                                           |          |          |
| MTS-T0068 | Breast Invasive Ductal Carcinoma<br>Breast Invasive Lobular         |          |          |
| MTS-T0076 | Carcinoma<br>Breast Mixed Ductal and Lobular                        |          |          |
| MTS-T0077 | Carcinoma<br>Breast Invasive Lobular                                |          |          |
| MTS-T0085 | Carcinoma<br>Breast Invasive Lobular                                |          |          |
| MTS-T0091 | Carcinoma                                                           |          |          |
| MTS-T0250 | Invasive Breast Carcinoma                                           |          |          |

---

**Supplementary Table 4. Summary of receptor status of breast cancer patients with co-amplification of *PI4KB* and *PIP5K1A* in METABRIC data.**

| # of patients | ER | HER2 |
|---------------|----|------|
| 258           | +  | -    |
| 61            | -  | -    |
| 20            | -  | +    |
| 20            | +  | NA   |
| 17            | +  | +    |
| 8             | -  | NA   |
| 7             | NA | NA   |
| 5             | NA | -    |
| 1             | NA | +    |

NA, not available.
